# Supplementary material for: Coupled Oceanic and Atmospheric Controls of Deglacial Southeastern South America Precipitation and Western South Atlantic Productivity
Source: Frontiers journal article supplement (doi:10.3389/fmars.2022.878116), 2022-06-30
Supplement: Table_1.xlsx [file Table_1.xlsx]

## Sheet: Sheet1
Depths [cm]	Age [ka]	Foraminiferal δ13C [‰ V-SMOW] G. ruber (p)
25.5	4.0295	1.56501
26.5	4.1625	1.77103
27.5	4.3085	2.06305
28.5	4.467	1.89304
29.5	4.632	1.94004
30.5	4.799	1.90904
31.5	4.9655	1.84005
32.5	5.13	1.19398
33.5	5.2935	1.95706
34.5	5.4605	1.88805
35.5	5.631	2.04707
36.5	5.8	1.369
37.5	5.968	1.82905
38.5	6.135	1.66003
39.5	6.301	1.67103
40.5	6.4685	1.87203
41.5	6.638	1.76202
42.5	6.8075	1.62901
43.5	6.9765	1.93303
44.5	7.149	1.85303
45.5	7.329	1.71001
46.5	7.5155	1.64701
47.5	7.7045	1.462
48.5	7.8935	1.93302
49.5	8.0835	1.373
50.5	8.274	1.393
51.5	8.464	1.79403
52.5	8.654	1.64802
53.5	8.8425	1.85803
54.5	9.0285	1.74703
55.5	9.216	1.404
56.5	9.405	1.439
57.5	9.593	1.66002
58.5	9.781	1.54501
59.5	9.973	1.64202
60.5	10.1725	1.14098
61.5	10.394	1.426
62.5	10.637	1.393
63.5	10.886	1.80903
64.5	11.135	1.63702
65.5	11.381	1.49701
66.5	11.6265
67.5	11.831	1.57601
68.5	11.986	1.55701
69.5	12.1235	1.349
70.5	12.2485	1.50901
71.5	12.3685	1.49701
72.5	12.4865	1.56401
73.5	12.602	1.421
74.5	12.7135	1.53801
75.5	12.819	1.408
76.5	12.9115	1.52001
77.5	12.994	1.404
78.5	13.0755	1.329
79.5	13.1545	1.18999
80.5	13.2315	1.50001
81.5	13.3085	1.59902
82.5	13.386	1.52801
83.5	13.4645	1.95106
84.5	13.543	1.15598
85.5	13.6215	1.352
86.5	13.7	1.71803
87.5	13.7785	1.402
88.5	13.856	1.45601
89.5	13.931	1.10698
90.5	14.003	0.830951
91.5	14.0685	1.24299
92.5	14.129	1.47601
93.5	14.188	1.54102
94.5	14.245	1.53102
95.5	14.302	1.18998
96.5	14.3595	1.45201
97.5	14.4165	1.403
98.5	14.473	1.386
99.5	14.529	1.16898
100.5	14.5855	1.71303
101.5	14.6425	1.47001
102.5	14.699	1.327
103.5	14.7555	1.471
104.5	14.8125	1.56801
105.5	14.8695	1.318
106.5	14.926	1.412
107.5	14.9825	1.353
108.5	15.0395	1.01898
109.5	15.096	1.362
110.5	15.1525	1.22199
111.5	15.2105	1.42125
112.5	15.2675	1.85831
113.5	15.323	1.37825
114.5	15.379	1.60428
115.5	15.436	1.39425
116.5	15.493	1.50627
117.5	15.549
118.5	15.605	1.21823
119.5	15.662	1.40925
120.5	15.72	0.951968
121.5	15.78	1.22323
122.5	15.8425	1.53327
123.5	15.9055	1.25323
124.5	15.968
125.5	16.03	1.48227
126.5	16.0925	1.53527
127.5	16.1555	1.51327
128.5	16.219	1.01921
129.5	16.283	1.32624
130.5	16.346	1.39325
131.5	16.4085	1.49826
132.5	16.471	1.45326
133.5	16.5345	1.50727
134.5	16.599	1.26524
135.5	16.6625	1.18623
136.5	16.7255	1.43626
137.5	16.7885	1.13722
138.5	16.852	1.56428
139.5	16.9155	1.48427
140.5	16.979	1.41425
141.5	17.0425	1.15222
142.5	17.1055	1.27923
143.5	17.169	1.25523
144.5	17.234	1.38525
145.5	17.2985	1.34324
146.5	17.3615	1.31424
147.5	17.424	1.22723
148.5	17.4865	1.50827
149.5	17.5505	1.47426
150.5	17.617	1.00097
151.5	17.692	1.45326
152.5	17.774	1.59528
153.5	17.857	1.17522
154.5	17.9435
155.5	18.032	1.34024
156.5	18.12	0.96319
157.5	18.2085	1.31624
158.5	18.298	1.58228
159.5	18.388	1.35025
160.5	18.4825	1.42326
161.5	18.5815	1.44426
162.5	18.681	1.47726
163.5	18.7825	1.25723
164.5	18.8855	1.42026
165.5	18.988	1.31024
166.5	19.0895	1.37925
167.5	19.1905	1.49427
168.5	19.292	1.47426
169.5	19.394	1.59128
