# Supplementary material for: Coupled Oceanic and Atmospheric Controls of Deglacial Southeastern South America Precipitation and Western South Atlantic Productivity
Source: Frontiers journal article supplement (doi:10.3389/fmars.2022.878116), 2022-06-30
Supplement: Table_2.xlsx [file Table_2.xlsx]

## Sheet: Sheet1
Depths [cm]	Age [ka]	Sedimentation Rate [cm/ka]	Dry Bulk Density [g/cm^3]	brGDGT [ng/g]	crenarchaeol [ng/g]	alkenone [ng/g]	n-alkane [ng/g]		brGDGT MAR [ng cm^-2 ka^-1]	crenarchaeol MAR [ng cm^-2 ka^-1]	alkenone MAR [ng cm^-2 ka^-1]	n-alkane MAR [ng cm^-2 ka^-1]	BIT index	carbon preference index (CPI)
25.5	4.0295	6.43701	0.661	1234.17	5214.53	225.659	62.1247		5251.23	22187.1	960.147	264.332	0.136237	1.96995
26.5	4.1625	7.53413	0.705
27.5	4.3085	6.8651	0.808	1757.24	8252.33	262.865	18.7023		9747.41	45775.7	1458.11	103.742	0.12301	2.58
28.5	4.467	6.31675	0.818
29.5	4.632	6.06083	0.527	1856.93	8345.14	262.969	97.7012		5931.14	26654.9	839.939	312.063	0.127831	2.71512
30.5	4.799	5.98824	0.727	1641.18	8873.67	465.424	57.051		7144.79	38631.1	2026.2	248.369	0.106561	3.60461
31.5	4.9655	6.00649	0.812	1627.15	7912.5	327.378	13.4362		7936.06	38591.4	1596.71	65.532	0.116662	2.37176
32.5	5.13	6.07908	0.833	1797.6	8701.47	395.484	32.1868		9102.84	44063.2	2002.68	162.99	0.11806	2.74224
33.5	5.2935	6.11627	0.716			188.628	22.2383				826.046	97.3868		2.09038
34.5	5.4605	5.99146	0.703	1650.35	8126.7	334.493	30.3302		6951.29	34229.7	1408.88	127.751	0.116271	2.9147
35.5	5.631	5.86515	0.929	1026.73	4765.92	345.941	32.1903		5594.37	25968.2	1884.94	175.396	0.121571	3.06373
36.5	5.8	5.91737	0.918	1666.95	9482.03	318.95	38.5428		9055.09	51507.8	1732.58	209.37	0.102781	3.14553
37.5	5.968	5.95238	0.992	1148.28	5718.98	208.168	29.6713		6780.31	33769.2	1229.18	175.202	0.114781
38.5	6.135	5.98824	0.912
39.5	6.301	6.0241	0.96	1487.37	7503.83	351.507	15.5002		8601.65	43395.6	2032.81	89.6398	0.112964	2.52
40.5	6.4685	5.97063	1.135
41.5	6.638	5.89976	0.843	1715.68	9240.66	238.189	49.5967		8532.9	45958.4	1184.63	246.669	0.107253	1.75184
42.5	6.8075	5.89976	0.904	1547.11	8699.21	314.112	24.1373		8251.34	46396.2	1675.28	128.734	0.103321	3.04423
43.5	6.9765	5.91716	0.676
44.5	7.149	5.79949	0.818	919.368	4967.57	210.62	21.0429		4361.47	23566.1	999.178	99.8273	0.109276	2.30102
45.5	7.329	5.5583	0.761	974.061	4875.25	164.31	28.2604		4120.15	20621.6	695.008	119.538	0.119858	2.35137
46.5	7.5155	5.36289	0.939	554.971	2692.74	232.168	14.8811		2794.7	13560	1169.14	74.9375	0.119261	3.45238
47.5	7.7045	5.29101	1.005
48.5	7.8935	5.29101	1.098	721.669	4003.75	119.544	15.8513		4192.55	23259.9	694.495	92.0884	0.106267	2.96875
49.5	8.0835	5.2633	0.971	628.239	3028.34	121.42	30.031		3210.72	15476.8	620.537	153.478	0.126163	2.14464
50.5	8.274	5.24938	0.91	752.862	4220.35	214.894	16.607		3596.37	20160.3	1026.54	79.3307	0.105345	3.67105
51.5	8.464	5.26316	0.787
52.5	8.654	5.26316	0.779	654.78	3721.93	153.729	7.78643		2684.6	15259.9	630.288	31.9244	0.106902	2.57778
53.5	8.8425	5.30538	0.66	791.556	3631.42	132.331	108.6		2771.67	12715.6	463.364	380.268	0.131634	3.19267
54.5	9.0285	5.3765	0.777	724.705	4079.94	125.487	11.4706		3027.48	17044.1	524.227	47.9189	0.107271	3.42222
55.5	9.216	5.33428	0.555
56.5	9.405	5.29115	0.688	661.332	3243.95	208.486	18.5565		2407.45	11809	758.954	67.5515	0.119535	2.32826
57.5	9.593	5.31915	0.633	856.377	4490.26	143.989	31.8118		2883.44	15118.8	484.814	107.111	0.112994	2.40829
58.5	9.781	5.31915	0.722	892.524	4238.55	113.202	9.46973		3427.67	16277.8	434.745	36.3678	0.128271	2.95139
59.5	9.973	5.21059	0.735
60.5	10.1725	5.01407	0.858	670.753	3411.79	176.173	20.2649		2885.63	14677.8	757.911	87.1811	0.116718	2.92208
61.5	10.394	4.54639	0.595	644.972	3284.21	21.8733	21.8733		1744.71	8884.13	59.1695	59.1695	0.121311	0.576499
62.5	10.637	4.11585	0.794	775.352	3890.46	141.338	19.4109		2533.84	12714	461.892	63.4346	0.119652	2.81078
63.5	10.886	4.01665	0.75
64.5	11.135	4.01665	0.686	832.233	4376.12	107.245	11.4873		2293.15	12058	295.505	31.6523	0.11502	3.65556
65.5	11.381	4.06504	0.535	949.772	4709.51	43.5981	43.5981		2065.56	10242.2	94.817	94.817	0.126532	2.3951
66.5	11.6265	4.07334	0.704	736.203	3643.31	146.447	7.76507		2111.16	10447.7	419.955	22.2673	0.117371	3.33333
67.5	11.831	5.0896	0.716	1074.05	5294.29	195.15	16.7989		3913.99	19293.2	711.157	61.2176	0.116128	4
68.5	11.986	6.47344	0.683	772.41	3613.71	104.073	31.0135		3415.1	15977.5	460.146	137.122	0.128028	2.67469
69.5	12.1235	7.30063	0.72	897.605	4455.96	19.8803	19.8803		4718.22	23422.5	104.5	104.5	0.123035	2.42183
70.5	12.2485	8.0082	0.722	864.477	4281.02	118.448	18.5397		4998.34	24752.5	684.857	107.195	0.122908	3.22323
71.5	12.3685	8.33391	0.784	1042.63	5456.31	125.516	36.9947		6812.29	35650.4	820.095	241.716	0.115578	4.16021
72.5	12.4865	8.47518	0.817	1087.6	5178.86	45.2404	45.2404		7530.81	35859.6	313.255	313.255	0.129387	2.76349
73.5	12.602	8.65947	0.65	874.45	4248.4	54.6889	17.5123		4921.98	23912.8	307.825	98.5708	0.124249	4.22511
74.5	12.7135	8.97312	0.86	752.215	3546.91	117.003	30.699		5804.76	27371.1	902.9	236.9	0.128199	3.30882
75.5	12.819	9.48912	0.727	994.702	4624.11	51.3972	51.3972		6862.04	31899.9	354.568	354.568	0.13298	2.51094
76.5	12.9115	10.9261	0.741	711.601	3430.81	50.5061	19.0113		5761.27	27776.5	408.908	153.919	0.131116	2.69537
77.5	12.994	12.1217	0.866	780.428	3503.39	64.0472	18.825		8192.43	36776.3	672.327	197.612	0.140415	3.67949
78.5	13.0755	12.2704	0.804	751.047	3330.67	37.1419	37.1419		7409.38	32858.4	366.42	366.42	0.143491	2.71019
79.5	13.1545	12.6663	0.795	656.288	3145.08	50.0095	11.9241		6608.66	31670.2	503.582	120.073	0.132379	3.65079
80.5	13.2315	12.987	1	651.538	3036.35	85.7683	29.0618		8461.54	39433.1	1113.87	377.425	0.136101	3.76476
81.5	13.3085	12.987	0.831	817.773	3617.09	70.3558	70.3558		8825.57	39036.4	759.295	759.295	0.143578	2.22736
82.5	13.386	12.9038	0.891	483.875	2166.45	42.2577	20.8463		5563.23	24908.2	485.848	239.676	0.139004	3.61053
83.5	13.4645	12.7394	0.707	565.622	2168.79	32.7118	12.6748		5094.4	19533.7	294.627	114.158	0.160024	3.5
84.5	13.543	12.7394	0.689						3114.46	12072.7	329.114		0.158697
85.5	13.6215	12.7394	0.813	411.132	1762.14	28.5437	3.11392		4258.14	18250.7	295.63	32.2512	0.145599	2.75
86.5	13.7	12.7394	0.856	656.119	3050.5	31.1609	7.46982		7154.92	33265.4	339.806	81.4576	0.137348	2.74725
87.5	13.7785	12.7394	0.836	834.863	3867.02	57.6816	57.6816		8891.38	41184.2	614.315	614.315	0.142394	2.11621
88.5	13.856	12.9081	0.797
89.5	13.931	13.3357	0.861	891.827	3532.61	46.2856	22.4089		10240	40561.6	531.453	257.299	0.157342	3.9114
90.5	14.003	13.8996	0.752	1273.86	2748.76	57.6816	57.6816		13315.1	28731.4	602.917	602.917	0.28137	2.44155
91.5	14.0685	15.3396	0.761	1388.92	5231.25	96.6541	20.753		16213.5	61066.6	1128.28	242.258	0.163463	4.02478
92.5	14.129	16.5301	0.831
93.5	14.188	16.954	0.687	1608.32	5391.16	82.2564	82.2564		18732.8	62793.1	958.074	958.074	0.185153	2.62981
94.5	14.245	17.5493	0.964	1700.38	5406.08	100.999	37.9063		28766.1	91457.2	1708.65	641.28	0.190835	4.17964
95.5	14.302	17.5493	0.701	1194.73	4140.47	89.6471	12.2128		14697.6	50936.2	1102.84	150.242	0.177853	2.89773
96.5	14.3595	17.3926	0.728	919.711	3205.64	65.5981	65.5981		11645.2	40589.3	830.592	830.592	0.17748	2.75189
97.5	14.4165	17.5439	0.803
98.5	14.473	17.7005	0.758	1480.57	5258.54	111.626	88.63		19864.8	70553.8	1497.69	1189.15	0.176067	4.19084
99.5	14.529	17.8571	0.903	1645.64	5228.99	66.9346	66.9346		26535.9	84317.5	1079.32	1079.32	0.196052	2.83752
100.5	14.5855	17.7005	0.941	1580.68	5252.38	100.163	34.7764		26328.1	87484.6	1668.34	579.241	0.186903	3.96131
101.5	14.6425	17.5439	0.859
102.5	14.699	17.7005	0.948	1705.63	4945.03	89.6775	89.6775		28620.6	82977.9	1504.8	1504.8	0.216922	3.09176
103.5	14.7555	17.7005	0.659
104.5	14.8125	17.5439	0.739
105.5	14.8695	17.5439	0.728	1726.3	4521.76	46.6958	46.6958		22048.2	57751.7	596.396	596.396	0.24126	2.20335
106.5	14.926	17.7005	0.737
107.5	14.9825	17.7005	0.792
108.5	15.0395	17.5439	0.669	1764.97	5425.98	125.259	125.259		20715.2	63683.9	1470.14	1470.14	0.211564	2.08651
109.5	15.096	17.7005	0.838
110.5	15.1525	17.7005	0.794
111.5	15.2105	17.2465	0.826	1954.66	5930.12	164.523	164.523		27845.4	84478.2	2343.74	2343.74	0.213011	4.26127
112.5	15.2675	17.5655	0.798
113.5	15.323	18.0195	0.724
114.5	15.379	17.8571	0.856	1773.06	5476.21	80.9322	80.9322		27102.4	83707.8	1237.11	1237.11	0.210161	4.24866
115.5	15.436	17.5493	0.905
116.5	15.493	17.5493	0.639
117.5	15.549	17.8571	0.718	1981.81	5697.06	71.6353	71.6353		25409.6	73044.5	918.467	918.467	0.222822	1.72307
118.5	15.605	17.8571	0.673	1985.84	5905.16	134.772	31.0486		23865.6	70967.3	1619.67	373.138	0.213705	4.38122
119.5	15.662	17.5493	0.776	3138.21	6081.19	113.28	42.5782		42736.8	82815.1	1542.67	579.839	0.300317	4.00759
120.5	15.72	17.2414	0.677	3050.12	6153.32	142.456	142.456		35602.2	71824	1662.81	1662.81	0.29506	4.04876
121.5	15.78	16.6852	0.611
122.5	15.8425	16.001	0.696
123.5	15.9055	15.873	0.561	2763.82	5709.32	118.378	118.378		24611.1	50840.1	1054.13	1054.13	0.290157	3.87357
124.5	15.968	16.001	0.819	2050.2	5408.93	121.118	99.5241		26867.6	70883.2	1587.23	1304.25	0.236103	4.09068
125.5	16.03	16.129	0.726	3165.94	5885.88	147.936	100.929		37072.2	68921.7	1732.28	1181.84	0.309461	4.72935
126.5	16.0925	16.001	0.581	2668.02	4695.53	111.848	111.848		24803.5	43652.5	1039.81	1039.81	0.325149	2.52593
127.5	16.1555	15.873	0.655
128.5	16.219	15.749	0.64
129.5	16.283	15.625	0.829
130.5	16.346	15.877	0.665
131.5	16.4085	16.001	0.857
132.5	16.471	16.001	1.039	2832.32	4761.66	147.991	147.991		47087.5	79162.9	2460.36	2460.36	0.33766	3.51536
133.5	16.5345	15.7568	0.76
134.5	16.599	15.5048	0.904
135.5	16.6625	15.749	0.807	1704.68	3644.53	75.4544	75.4544		21665.5	46319.9	958.984	958.984	0.280777	3.59405
136.5	16.7255	15.873	0.846
137.5	16.7885	15.873	0.815
138.5	16.852	15.749	0.981	3230.4	5571.58	64.6751	64.6751		49909	86079.7	999.216	999.216	0.33081	4.16172
139.5	16.9155	15.749	0.925
140.5	16.979	15.749	0.736
141.5	17.0425	15.749	0.572	2773.52	5164.04	71.869	71.869		24985	46519.9	647.427	647.427	0.312471	3.8337
142.5	17.1055	15.873	0.633
143.5	17.169	15.749	0.916
144.5	17.234	15.3883	1.076	3376.03	5143.59	126.486	126.486		55899.5	85166.3	2094.32	2094.32	0.359047	4.90024
145.5	17.2985	15.5123	1.155
146.5	17.3615	15.873	0.895
147.5	17.424	16.001	0.9	1978.04	3853.88	47.2054	100.327		28485.6	55499.5	679.802	1444.8	0.303657	3.59053
148.5	17.4865	16.001	0.936
149.5	17.5505	15.6288	1.009
150.5	17.617	15.0452	1.027	2112.62	4078.49	88.1636	42.4358		32643.1	63018.6	1362.26	655.695	0.30357	3.90566
151.5	17.692	13.4505	1.067
152.5	17.774	12.1951	0.997
153.5	17.857	12.0499	0.936	1088.97	1805.9	47.0966	36.0766		12282.2	20368.3	531.191	406.898	0.340138
154.5	17.9435	11.5704	1.091
155.5	18.032	11.2998	1.204
156.5	18.12	11.3636	1.117	4129.44	5820.78	167.322	112.112		52415.7	73884.2	2123.85	1423.05	0.374073	4.7605
157.5	18.2085	11.2998	1.119
158.5	18.298	11.1735	1.031	3263.03	4529.6	135.483	67.5055		37589.9	52180.6	1560.75	777.657	0.377988	4.94583
159.5	18.388	11.1111	1.073
160.5	18.4825	10.6061	1.14	4288.73	5091.44	128.902	69.7362		51854.6	61560.1	1558.54	843.174	0.418304	4.99446
161.5	18.5815	10.101	1.261
162.5	18.681	10.0505	1.048	4309.99	5229.67	144.031	59.0893		45396.9	55083.8	1517.07	622.383	0.41138	4.59641
163.5	18.7825	9.85437	0.858
164.5	18.8855	9.70874	0.632	5504.92	5788.21	149.156	85.6666		33777.8	35516	915.21	525.644	0.448161	4.77561
165.5	18.988	9.75633	0.665
166.5	19.0895	9.85246	0.867
167.5	19.1905	9.90099	0.816
168.5	19.292	9.85246	0.998
169.5	19.394	9.80392	1.127
