# Supplementary material for: Coupled Oceanic and Atmospheric Controls of Deglacial Southeastern South America Precipitation and Western South Atlantic Productivity
Source: Frontiers journal article supplement (doi:10.3389/fmars.2022.878116), 2022-06-30
Supplement: Table_3.XLSX [file Table_3.XLSX]

## Sheet: Sheet1
Depths [cm]	Age [ka]	Sedimentation Rate [cm/ka]	Dry Bulk Density [g/cm^3]	K/Al	Al/Si	Al MAR [ng cm^-2 ka^-1]	Ti MAR [ng cm^-2 ka^-1]	Fe MAR [ng cm^-2 ka^-1]	K MAR [ng cm^-2 ka^-1]	Ca MAR [ng cm^-2 ka^-1]	Al [%]	Ti [%]	Fe [%]	K [%]	Si [%]	Ca [%]
25.5	4.0295	6.43701	0.661	0.128764	0.388361	15.4214	0.926207	2.11891	1.98572	41.7324	3.62443	0.217682	0.497996	0.466694	39.7091	9.80816
26.5	4.1625	7.53413	0.705
27.5	4.3085	6.8651	0.808	0.217472	0.266064	24.155	1.04256	7.02177	5.25304	86.8131	4.35461	0.187951	1.26587	0.947006	90.7866	15.6505
28.5	4.467	6.31675	0.818
29.5	4.632	6.06083	0.527	0.183604	0.352836	15.3296	0.780041	2.98746	2.81458	50.3931	4.79941	0.244216	0.935318	0.881192	43.4467	15.7771
30.5	4.799	5.98824	0.727	0.244522	0.251716	17.846	0.849265	5.19668	4.36374	65.8364	4.09927	0.195079	1.19369	1.00236	70.8971	15.1228
31.5	4.9655	6.00649	0.812	0.189318	0.293601	27.0358	1.01592	7.22062	5.11835	81.601	5.54321	0.208297	1.48046	1.04943	92.0833	16.7309
32.5	5.13	6.07908	0.833	0.229086	0.231824	23.6107	1.01619	6.3636	5.40888	77.9802	4.66257	0.200674	1.25667	1.06813	101.847	15.3993
33.5	5.2935	6.11627	0.716	0.162355	0.351269	24.1836	1.01713	4.53914	3.92633	68.4719	5.52233	0.232262	1.03651	0.896577	68.8465	15.6356
34.5	5.4605	5.99146	0.703	0.229371	0.262666	17.6418	0.85403	5.2537	4.04653	62.4744	4.18847	0.202761	1.24732	0.960715	67.1644	14.8325
35.5	5.631	5.86515	0.929	0.231312	0.249225	21.8478	1.05095	6.31844	5.05366	77.0398	4.00971	0.19288	1.15962	0.927494	87.6631	14.139
36.5	5.8	5.91737	0.918	0.263911	0.207913	19.7357	1.02916	6.23556	5.20846	73.2165	3.63313	0.189458	1.1479	0.958822	94.9224	13.4784
37.5	5.968	5.95238	0.992	0.184054	0.331132	27.1446	1.42177	5.55071	4.99606	85.2184	4.59706	0.240783	0.940039	0.846107	81.975	14.4321
38.5	6.135	5.98824	0.912
39.5	6.301	6.0241	0.96	0.210956	0.283625	24.6528	1.11268	7.14455	5.20066	91.6386	4.26288	0.192401	1.23541	0.89928	86.9205	15.8458
40.5	6.4685	5.97063	1.135
41.5	6.638	5.89976	0.843	0.194432	0.352357	23.1881	0.94	6.55061	4.50852	74.0656	4.66234	0.189002	1.3171	0.90651	65.8087	14.8921
42.5	6.8075	5.89976	0.904	0.22562	0.270113	22.2972	1.07612	6.4642	5.03069	80.6281	4.18068	0.201772	1.21203	0.943246	82.5476	15.1176
43.5	6.9765	5.91716	0.676
44.5	7.149	5.79949	0.818	0.240587	0.232388	16.807	0.965038	5.73754	4.04356	59.6941	3.54281	0.203424	1.20944	0.852356	72.3233	12.5831
45.5	7.329	5.5583	0.761	0.217298	0.28121	17.9138	0.803255	5.38035	3.89264	58.2079	4.23508	0.189901	1.27199	0.920275	63.7027	13.7612
46.5	7.5155	5.36289	0.939	0.252864	0.219606	19.8285	1.01586	6.20268	5.01392	74.376	3.93755	0.20173	1.23173	0.995664	90.2914	14.7696
47.5	7.7045	5.29101	1.005
48.5	7.8935	5.29101	1.098	0.297682	0.183569	19.7285	1.00585	6.35777	5.87283	70.11	3.39589	0.173137	1.09437	1.0109	107.472	12.0681
49.5	8.0835	5.2633	0.971	0.266894	0.23765	20.9332	1.19686	6.43779	5.58693	70.3207	4.09598	0.234188	1.25968	1.09319	88.084	13.7596
50.5	8.274	5.24938	0.91	0.317357	0.162103	14.7136	0.869781	5.16488	4.66947	56.2819	3.08014	0.182079	1.08121	0.977504	90.7671	11.782
51.5	8.464	5.26316	0.787
52.5	8.654	5.26316	0.779	0.364894	0.141253	11.4245	0.863272	4.38554	4.16875	46.0624	2.78647	0.210554	1.06964	1.01677	80.8801	11.2347
53.5	8.8425	5.30538	0.66	0.221707	0.263137	18.6921	0.977446	3.98865	4.14419	52.7776	5.33825	0.279147	1.13911	1.18353	71.0359	15.0726
54.5	9.0285	5.3765	0.777	0.259105	0.21262	15.6024	1.07296	5.11976	4.04265	52.5103	3.73483	0.256839	1.22554	0.967712	73.3816	12.5697
55.5	9.216	5.33428	0.555
56.5	9.405	5.29115	0.688	0.288632	0.19472	12.7062	0.721552	4.21992	3.66743	46.9653	3.49042	0.198212	1.15922	1.00745	65.2538	12.9014
57.5	9.593	5.31915	0.633	0.215423	0.256536	15.8923	0.813458	3.3638	3.42356	46.8347	4.71998	0.241596	0.999042	1.01679	61.9495	13.9098
58.5	9.781	5.31915	0.722	0.319665	0.16047	12.4388	0.807216	4.38691	3.97624	43.1934	3.23891	0.210189	1.1423	1.03536	77.5147	11.247
59.5	9.973	5.21059	0.735
60.5	10.1725	5.01407	0.858	0.272861	0.203534	15.996	1.01889	5.69585	4.36468	55.6942	3.7182	0.236837	1.32398	1.01455	78.5911	12.9459
61.5	10.394	4.54639	0.595	0.274296	0.195719	11.2225	0.537338	3.73465	3.0783	31.3094	4.14866	0.198639	1.3806	1.13796	57.3401	11.5742
62.5	10.637	4.11585	0.794	0.27379	0.211024	12.8317	0.788294	4.1658	3.51319	41.7665	3.92648	0.241217	1.27473	1.07503	60.8067	12.7805
63.5	10.886	4.01665	0.75
64.5	11.135	4.01665	0.686	0.287662	0.175834	10.7235	0.646459	3.53714	3.08473	30.9217	3.89177	0.234614	1.2837	1.11951	60.9862	11.2221
65.5	11.381	4.06504	0.535	0.220166	0.275338	11.2519	0.544342	3.22922	2.47729	29.1024	5.17377	0.250296	1.48484	1.13909	40.8658	13.3817
66.5	11.6265	4.07334	0.704	0.268601	0.217537	10.4142	0.592838	3.51617	2.79727	33.4199	3.63164	0.206735	1.22616	0.975465	47.8732	11.6542
67.5	11.831	5.0896	0.716	0.231785	0.246919	14.6581	0.78084	4.72716	3.39754	43.981	4.02237	0.214272	1.29719	0.932326	59.364	12.0689
68.5	11.986	6.47344	0.683	0.249179	0.238298	19.1949	0.952066	6.5507	4.78297	51.2138	4.3414	0.215333	1.4816	1.08179	80.5498	11.5833
69.5	12.1235	7.30063	0.72	0.215718	0.287422	26.1825	1.23006	7.33642	5.64802	61.7414	4.98102	0.23401	1.3957	1.07449	91.0942	11.7458
70.5	12.2485	8.0082	0.722	0.230908	0.231045	25.1524	1.2399	8.16591	5.8079	68.2876	4.35019	0.214444	1.41232	1.00449	108.864	11.8105
71.5	12.3685	8.33391	0.784	0.314511	0.177269	24.491	1.53812	9.08243	7.7027	70.3333	3.74836	0.23541	1.39007	1.1789	138.158	10.7645
72.5	12.4865	8.47518	0.817	0.219983	0.266539	33.8669	1.65678	10.5756	7.45013	75.2857	4.89107	0.239274	1.52733	1.07595	127.061	10.8728
73.5	12.602	8.65947	0.65	0.266677	0.222174	24.0555	1.46052	8.70723	6.41504	62.2642	4.27375	0.25948	1.54695	1.13971	108.273	11.062
74.5	12.7135	8.97312	0.86	0.341654	0.175194	27.6219	1.52578	11.5657	9.43715	84.4148	3.57942	0.197719	1.49875	1.22292	157.665	10.939
75.5	12.819	9.48912	0.727	0.313123	0.199208	28.8925	1.76895	8.57182	9.0469	68.3785	4.18818	0.256422	1.24255	1.31141	145.037	9.91196
76.5	12.9115	10.9261	0.741	0.290915	0.193409	34.769	1.78341	12.552	10.1148	89.8849	4.29448	0.220278	1.55036	1.24933	179.77	11.1021
77.5	12.994	12.1217	0.866	0.319549	0.181288	40.5592	2.18239	16.0169	12.9606	107.315	3.86375	0.207899	1.52581	1.23466	223.728	10.223
78.5	13.0755	12.2704	0.804	0.286828	0.223777	39.0995	2.14555	14.9907	11.2148	100.406	3.9633	0.217482	1.51952	1.13679	174.725	10.1776
79.5	13.1545	12.6663	0.795	0.316813	0.175523	38.2349	2.05014	14.4388	12.1133	108.741	3.79701	0.203594	1.43388	1.20294	217.834	10.7988
80.5	13.2315	12.987	1	0.292753	0.192384	50.3782	2.69469	19.6692	14.7484	139.005	3.87913	0.207491	1.51453	1.13563	261.863	10.7034
81.5	13.3085	12.987	0.831	0.296019	0.244763	45.1199	2.85156	17.0614	13.3563	122.249	4.18079	0.264224	1.5809	1.23759	184.341	11.3275
82.5	13.386	12.9038	0.891	0.330144	0.171477	43.5269	2.61683	18.9176	14.3701	115.721	3.78585	0.227605	1.6454	1.24988	253.835	10.0651
83.5	13.4645	12.7394	0.707	0.334237	0.173826	32.0343	1.72153	13.4492	10.707	90.6673	3.55671	0.191138	1.49323	1.18878	184.289	10.0666
84.5	13.543	12.7394	0.689
85.5	13.6215	12.7394	0.813	0.314152	0.184938	38.1017	2.49281	16.3734	11.9697	129.872	3.67879	0.240686	1.58089	1.1557	206.024	12.5394
86.5	13.7	12.7394	0.856	0.371472	0.168441	37.5798	2.08927	15.9912	13.9598	112.448	3.44614	0.19159	1.46642	1.28014	223.103	10.3117
87.5	13.7785	12.7394	0.836	0.316416	0.205384	45.5823	2.44672	16.7233	14.423	124.583	4.27998	0.229736	1.57024	1.35426	221.937	11.6978
88.5	13.856	12.9081	0.797
89.5	13.931	13.3357	0.861	0.316368	0.199963	42.2244	2.25091	18.3405	13.3584	129.797	3.67743	0.196037	1.59732	1.16342	211.161	11.3044
90.5	14.003	13.8996	0.752	0.348056	0.208597	43.2343	2.98829	16.7413	15.048	105.461	4.13626	0.285892	1.60165	1.43965	207.263	10.0896
91.5	14.0685	15.3396	0.761	0.335085	0.189562	41.043	2.24094	18.275	13.7529	138.493	3.51593	0.191969	1.56552	1.17814	216.515	11.8639
92.5	14.129	16.5301	0.831
93.5	14.188	16.954	0.687	0.327168	0.235729	45.8142	2.82683	17.8376	14.989	135.084	3.93342	0.2427	1.53146	1.28689	194.351	11.5978
94.5	14.245	17.5493	0.964	0.321892	0.192444	61.2071	3.66913	26.0267	19.7021	171.524	3.61798	0.216884	1.53845	1.1646	318.051	10.1389
95.5	14.302	17.5493	0.701	0.30951	0.208663	46.9183	3.06815	19.764	14.5217	133.91	3.81387	0.249402	1.60656	1.18043	224.852	10.8852
96.5	14.3595	17.3926	0.728	0.298593	0.2548	55.682	3.05459	20.5751	16.6263	154.81	4.39763	0.241244	1.62497	1.3131	218.532	12.2265
97.5	14.4165	17.5439	0.803
98.5	14.473	17.7005	0.758	0.351136	0.178994	48.102	2.7818	21.8432	16.8903	141.647	3.58516	0.207334	1.62803	1.25888	268.735	10.5573
99.5	14.529	17.8571	0.903	0.303836	0.219827	65.6612	3.71891	26.6208	19.9502	174.616	4.07201	0.23063	1.6509	1.23722	298.695	10.8289
100.5	14.5855	17.7005	0.941	0.258803	0.2512	63.3006	3.66354	23.1719	16.3824	232.606	3.80043	0.219951	1.39119	0.983564	251.993	13.9652
101.5	14.6425	17.5439	0.859
102.5	14.699	17.7005	0.948	0.308159	0.229697	52.3272	3.59722	21.9152	16.1251	156.488	3.11841	0.214375	1.30603	0.960967	227.81	9.3258
103.5	14.7555	17.7005	0.659
104.5	14.8125	17.5439	0.739
105.5	14.8695	17.5439	0.728	0.312567	0.258839	58.4967	3.58111	22.8807	18.2842	139.676	4.5801	0.280389	1.79149	1.43159	225.997	10.9362
106.5	14.926	17.7005	0.737
107.5	14.9825	17.7005	0.792
108.5	15.0395	17.5439	0.669	0.284156	0.27047	51.1661	2.86509	20.1042	14.5392	122.65	4.35945	0.244111	1.71291	1.23877	189.175	10.45
109.5	15.096	17.7005	0.838
110.5	15.1525	17.7005	0.794
111.5	15.2105	17.2465	0.826	0.270202	0.264378	66.0289	3.54469	24.1868	17.8411	167.143	4.63503	0.248827	1.69784	1.25239	249.752	11.733
112.5	15.2675	17.5655	0.798
113.5	15.323	18.0195	0.724
114.5	15.379	17.8571	0.856	0.235752	0.323672	78.741	3.87503	23.6781	18.5633	182.086	5.15128	0.253506	1.54903	1.21442	243.274	11.9122
115.5	15.436	17.5493	0.905
116.5	15.493	17.5493	0.639
117.5	15.549	17.8571	0.718	0.262133	0.27989	54.9176	3.00667	18.9965	14.3957	180.824	4.28327	0.234503	1.48162	1.12279	196.211	14.1033
118.5	15.605	17.8571	0.673	0.282379	0.22734	50.0901	3.11817	20.2979	14.1444	124.454	4.16797	0.259462	1.68898	1.17695	220.331	10.3558
119.5	15.662	17.5493	0.776	0.260353	0.252952	54.7042	2.48774	19.3545	14.2424	158.681	4.01699	0.182677	1.42122	1.04583	216.263	11.6521
120.5	15.72	17.2414	0.677	0.264236	0.287834	50.491	2.80207	18.2363	13.3416	147.357	4.32567	0.240059	1.56235	1.143	175.417	12.6244
121.5	15.78	16.6852	0.611
122.5	15.8425	16.001	0.696
123.5	15.9055	15.873	0.561	0.27073	0.272715	41.1669	2.19526	14.2909	11.1451	106.089	4.62302	0.246527	1.60486	1.25159	150.952	11.9137
124.5	15.968	16.001	0.819	0.295492	0.229628	55.3591	3.19897	19.9241	16.3582	144.432	4.22432	0.244106	1.52036	1.24825	241.081	11.0213
125.5	16.03	16.129	0.726	0.327806	0.211596	47.6437	2.89458	19.8682	15.6179	87.3289	4.06875	0.247195	1.69673	1.33376	225.163	7.45784
126.5	16.0925	16.001	0.581	0.266178	0.285184	44.5602	2.5107	14.9232	11.8609	99.3035	4.79318	0.270066	1.60523	1.27584	156.251	10.6817
127.5	16.1555	15.873	0.655
128.5	16.219	15.749	0.64
129.5	16.283	15.625	0.829
130.5	16.346	15.877	0.665
131.5	16.4085	16.001	0.857
132.5	16.471	16.001	1.039	0.253249	0.305665	91.7274	4.89562	32.5061	23.2299	187.763	5.51742	0.294472	1.95525	1.39728	300.092	11.294
133.5	16.5345	15.7568	0.76
134.5	16.599	15.5048	0.904
135.5	16.6625	15.749	0.807	0.258357	0.292858	68.377	4.06764	23.0526	17.6657	167.413	5.38001	0.320049	1.81382	1.38997	233.482	13.1723
136.5	16.7255	15.873	0.846
137.5	16.7885	15.873	0.815
138.5	16.852	15.749	0.981	0.248159	0.309276	88.0892	4.62834	28.1102	21.8601	166.585	5.70165	0.299573	1.81946	1.41491	284.824	10.7824
139.5	16.9155	15.749	0.925
140.5	16.979	15.749	0.736
141.5	17.0425	15.749	0.572	0.266087	0.259553	46.1342	2.35561	15.443	12.2757	98.2123	5.12123	0.26149	1.71429	1.36269	177.745	10.9023
142.5	17.1055	15.873	0.633
143.5	17.169	15.749	0.916
144.5	17.234	15.3883	1.076	0.245744	0.300225	94.9555	5.19323	32.1921	23.3347	171.086	5.7348	0.313643	1.94423	1.40929	316.282	10.3327
145.5	17.2985	15.5123	1.155
146.5	17.3615	15.873	0.895
147.5	17.424	16.001	0.9	0.300881	0.196077	64.9695	3.2057	23.385	19.5481	145.113	4.51148	0.222604	1.62385	1.35742	331.346	10.0766
148.5	17.4865	16.001	0.936
149.5	17.5505	15.6288	1.009
150.5	17.617	15.0452	1.027	0.308893	0.212937	68.1137	3.90289	24.6569	21.0398	153.443	4.40823	0.25259	1.59576	1.36167	319.877	9.93062
151.5	17.692	13.4505	1.067
152.5	17.774	12.1951	0.997
153.5	17.857	12.0499	0.936	0.290309	0.229133	49.3606	2.85303	18.1954	14.3298	110.086	4.37643	0.252956	1.61325	1.27052	215.424	9.7605
154.5	17.9435	11.5704	1.091
155.5	18.032	11.2998	1.204
156.5	18.12	11.3636	1.117	0.283487	0.244242	68.108	4.22255	25.8401	19.3077	112.918	5.36572	0.332663	2.03575	1.52111	278.855	8.89597
157.5	18.2085	11.2998	1.119
158.5	18.298	11.1735	1.031	0.289308	0.25144	56.6643	3.62008	21.4479	16.3935	87.5055	4.91882	0.314245	1.86181	1.42305	225.359	7.59602
159.5	18.388	11.1111	1.073
160.5	18.4825	10.6061	1.14	0.298054	0.233157	56.0111	3.57978	22.2598	16.6943	93.1374	4.6325	0.296072	1.84104	1.38073	240.229	7.70309
161.5	18.5815	10.101	1.261
162.5	18.681	10.0505	1.048	0.285718	0.269366	52.5149	3.36221	21.6441	15.0045	77.1265	4.98578	0.319209	2.0549	1.42453	194.957	7.32241
163.5	18.7825	9.85437	0.858
164.5	18.8855	9.70874	0.632	0.235034	0.249524	30.8473	1.33214	10.6565	7.25018	81.6471	5.02733	0.217105	1.73674	1.1816	123.625	13.3064
165.5	18.988	9.75633	0.665
166.5	19.0895	9.85246	0.867
167.5	19.1905	9.90099	0.816
168.5	19.292	9.85246	0.998
169.5	19.394	9.80392	1.127
